# Supplementary material for: Phagocytosis of a PFOB-Nanoemulsion for 19F Magnetic Resonance Imaging: First Results in Monocytes of Patients with Stable Coronary Artery Disease and ST-Elevation Myocardial Infarction
Source: MDPI journal article supplement (doi:10.3390/molecules24112058), 2019-05-30
Supplement: s1 [file s1]

# Supplementary materials

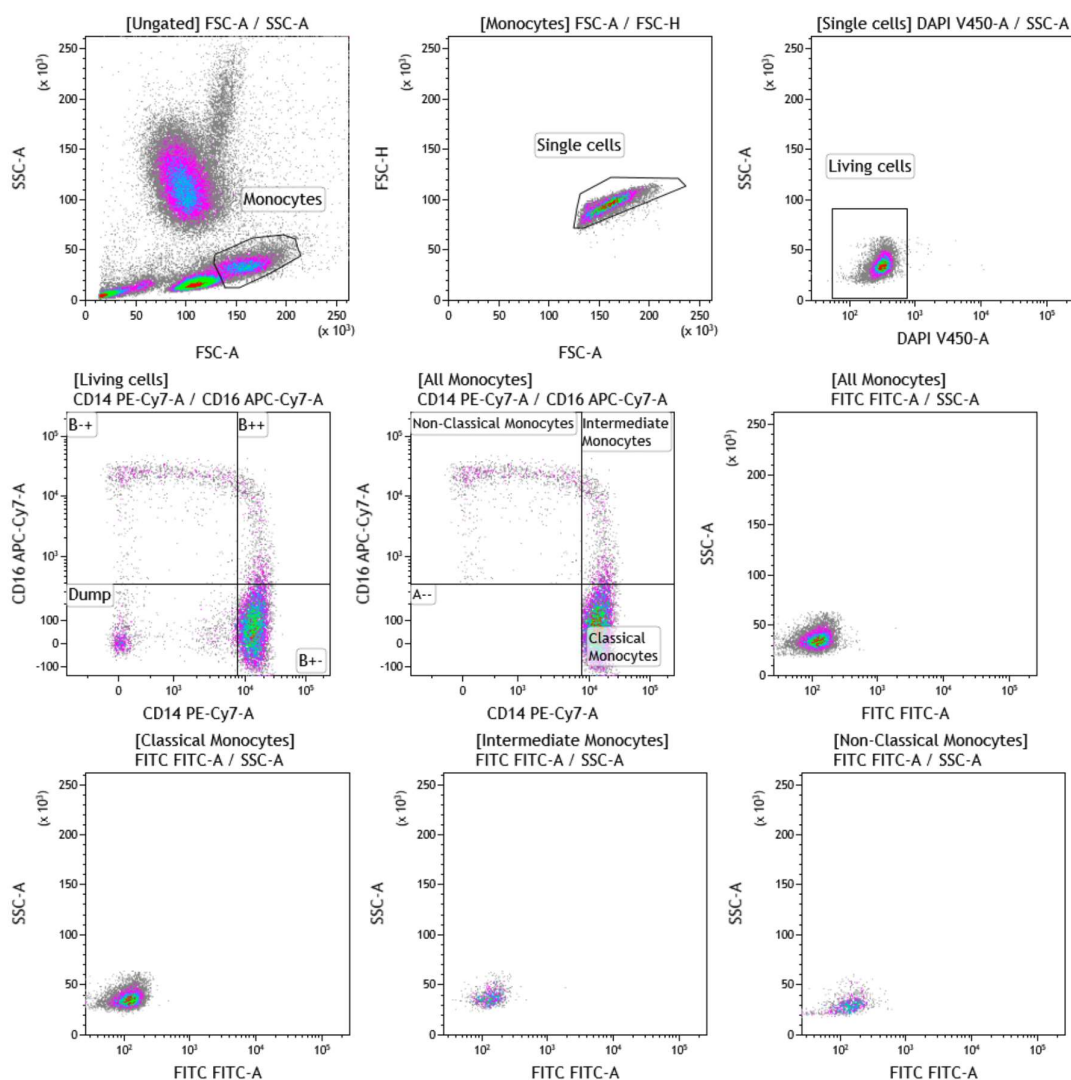

**Supplementary Figure S1.** Monocyte gating strategy. Monocytes were identified by size and granularity (FSC and SSC). After exclusion of dead cells (DAPI) and cell duplicates (FSC-H, FSC-A) monocyte subsets were identified by CD14 and CD16 staining. 6-FAM fluorescence intensity was measured over the time for all monocyte subsets.

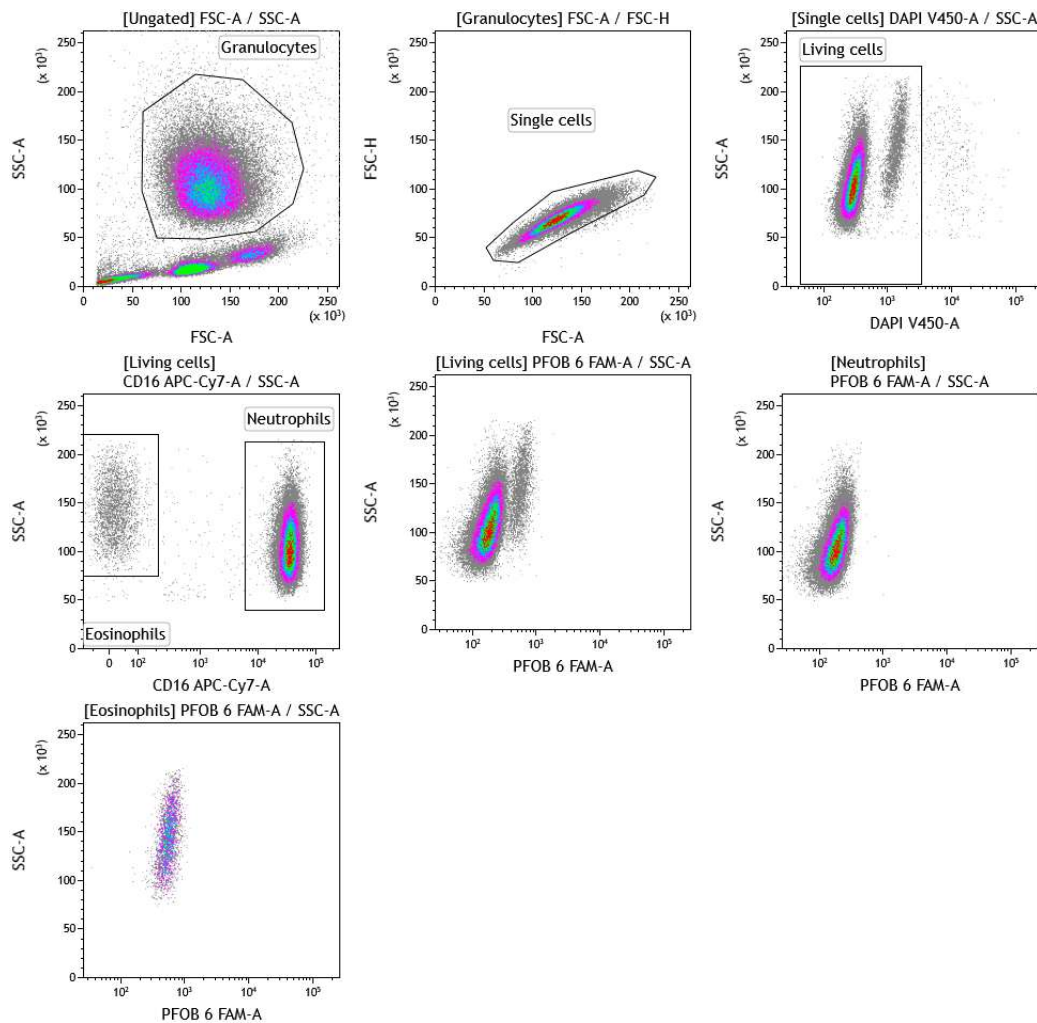

**Supplementary Figure S2.** Neutrophils gating strategy. Granulocytes were identified by size and granularity (FSC and SSC). After exclusion of dead cells (DAPI) and cell duplicates (FSC-H, FSC-A) neutrophils were identified by CD16 staining. 6-FAM fluorescence intensity was measured over the time.

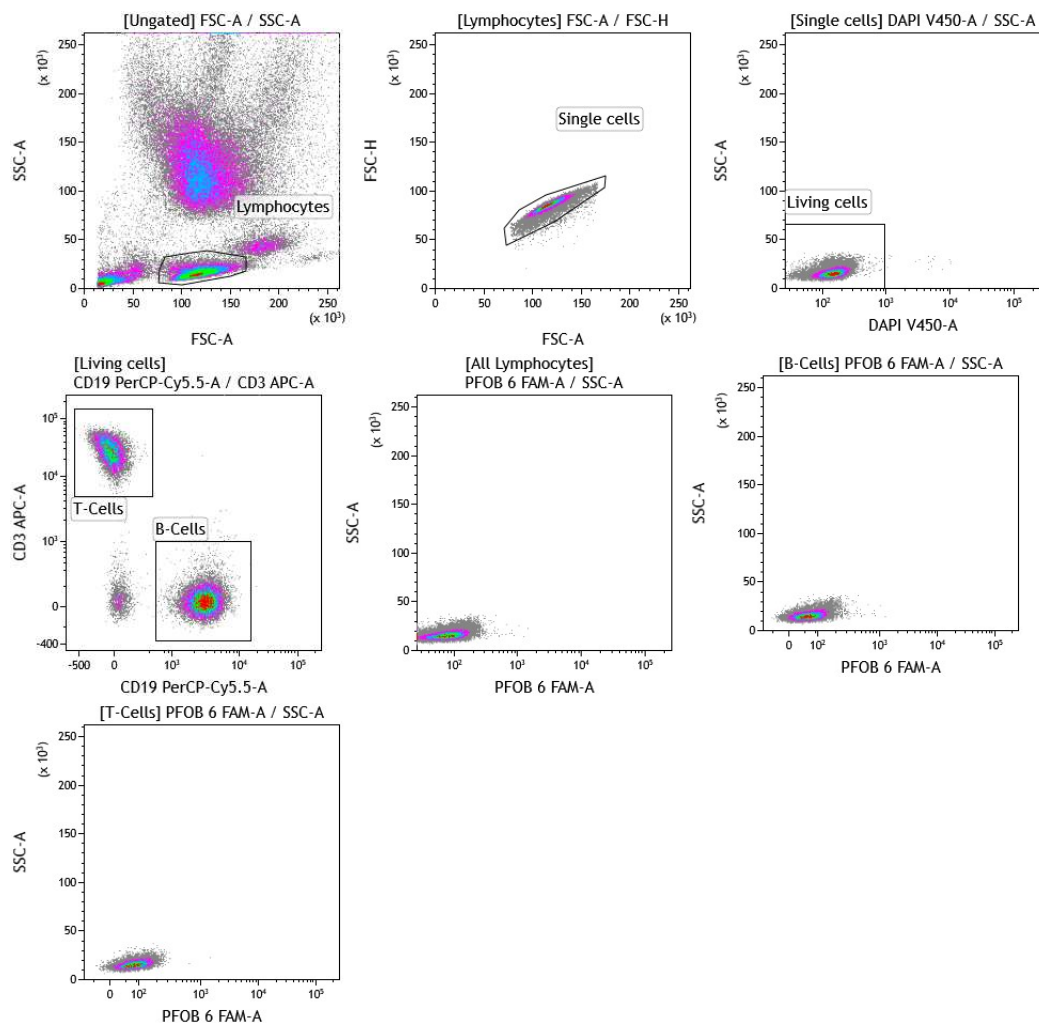

**Supplementary Figure S3.** Lymphocyte gating strategy. Lymphocytes were identified by size and granularity (FSC and SSC). After exclusion of dead cells (DAPI) and cell duplicates (FSC-H, FSC-A) B cells and T cells were identified by CD19 and CD3 staining. 6-FAM fluorescence intensity was measured over the time.

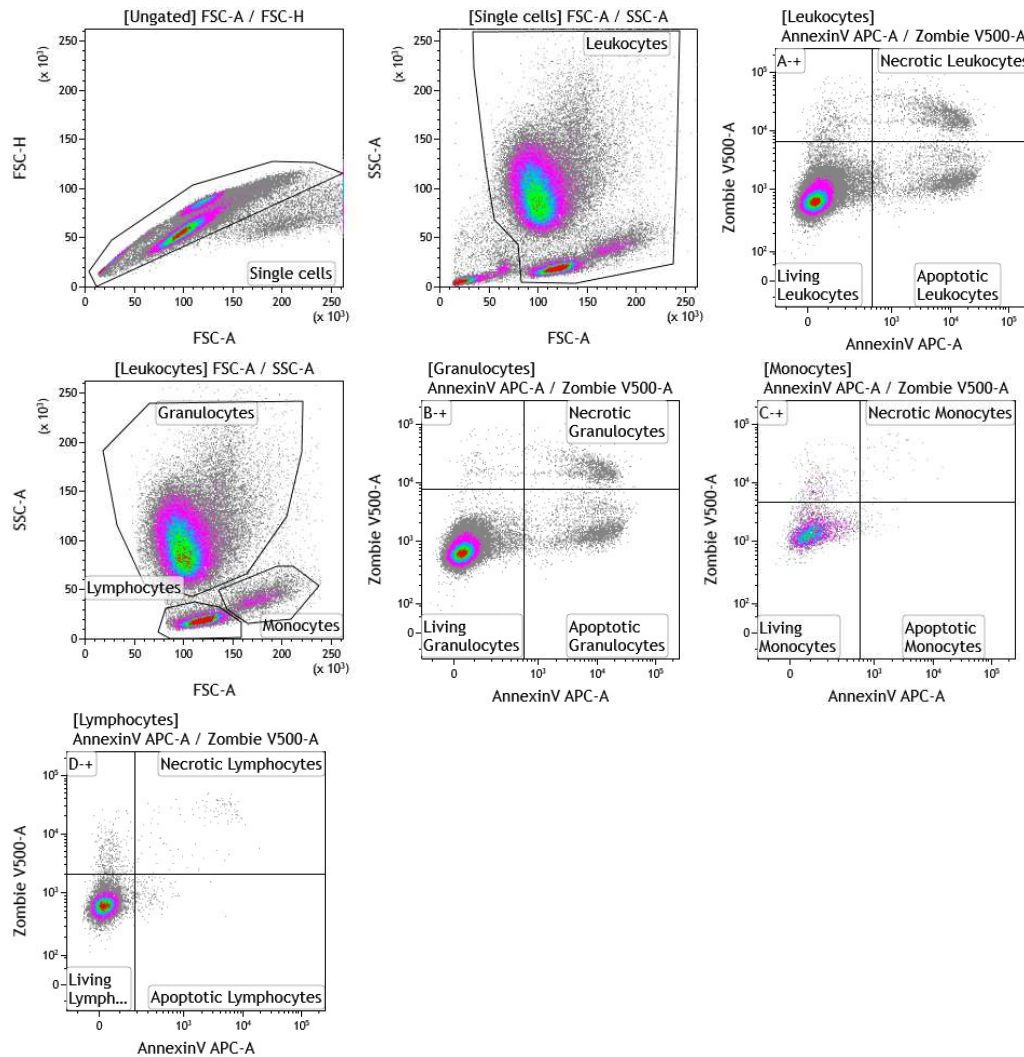

20  
21

22 **Supplementary Figure S4.** Apoptosis/necrosis gating strategy. Leukocytes as well as leukocyte  
23 subsets (granulocytes, monocytes, lymphocytes) were identified by size and granularity (FSC and  
24 SSC). Cell duplicates were excluded (FSC-H, FSC-A). Apoptosis and necrosis was detected by  
25 Annexin V and Zombie staining.

26

27

**Supplementary table S1.** Inclusion and exclusion criteria

| <b>Patients with STEMI</b>                         |                                                                                       |
|----------------------------------------------------|---------------------------------------------------------------------------------------|
| <b>Inclusion criteria</b>                          | <b>Exclusion criteria</b>                                                             |
| Diagnosis of STEMI according to the ESC guidelines | Acute infectious disease (Leukocytosis and/or CRP > 10 mg/dl and proven infect focus) |
| Day 3 after reperfusion                            | COPD GOLD $\geq$ III                                                                  |
| Age > 40 years                                     | Renal insufficiency, CKD-Stadium $\geq$ 4                                             |
| Informed consent                                   | Haematological and/or oncological diseases                                            |
|                                                    | Allergic asthma                                                                       |
|                                                    | Autoimmune diseases                                                                   |
|                                                    | Operation within the last 3 months                                                    |
| <b>Patients with SCAD</b>                          |                                                                                       |
| <b>Inclusion criteria</b>                          | <b>Exclusion criteria</b>                                                             |
| Angiographically proven coronary artery disease    | Acute infectious disease (Leukocytosis and/or CRP > 10 mg/dl and proven infect focus) |
| Age > 40 years                                     | Evidence of acute Myocardial infarction up to < 3 months ago                          |
| Informed consent                                   | Unstable angina pectoris                                                              |
|                                                    | COPD GOLD $\geq$ III                                                                  |
|                                                    | Renal insufficiency, CKD-Stadium $\geq$ 4                                             |
|                                                    | Haematological and/or oncological diseases                                            |
|                                                    | Allergic asthma                                                                       |
|                                                    | Autoimmune diseases                                                                   |
|                                                    | Operation within the last 3 months                                                    |

28

COPD = chronic obstructive pulmonary disease, CKD = chronic kidney disease, CRP = C reactive protein

29

30

**Supplementary table S2.** Patient characteristics

| <b>Basic characteristics</b>               | <b>STEMI</b>    | <b>SCAD</b>  |
|--------------------------------------------|-----------------|--------------|
| Number of patients                         | 16              | 20           |
| Sex (m:f)                                  | 13:3            | 17:3         |
| Age (years)                                | 60.3 ± 8.4      | 69.2 ± 10.6  |
| BMI (kg/cm <sup>2</sup> )                  | 29.4 ± 5.2      | 27.6 ± 3.9   |
| <b>Cardiovascular risk factors</b>         | <b>STEMI</b>    | <b>SCAD</b>  |
| Arterial Hypertension                      | 62.2 %          | 95 %         |
| Hyperlipoproteinaemia                      | 31.25 %         | 60 %         |
| Diabetes mellitus                          | 25 %            | 35 %         |
| Nicotine abuse                             | 56.25 %         | 30 %         |
| Positive family history                    | 25 %            | 10 %         |
| <b>Laboratory parameters</b>               | <b>STEMI</b>    | <b>SCAD</b>  |
| CK max. (U/l)                              | 887.1 ± 709.8   | 101.1 ± 44.1 |
| Troponin max. (ng/l)                       | 3259.7 ± 2120.6 | 22.7 ± 13.5  |
| Leukocytes/μl                              | 9.05 ± 2.8      | 7.73 ± 1.41  |
| CRP (mg/dl)                                | 4.1 ± 8.1       | 0.6 ± 0.9    |
| Creatinine (mg/dl)                         | 1.1 ± 0.3       | 0.9 ± 0.2    |
| eGFR (ml/min)                              | 74.0 ± 19.3     | 79.3 ± 13.3  |
| Percent Monocytes of all<br>Leukocytes (%) | 4.9 ± 1.4       | 4.9 ± 1.29   |

31

32

33

BMI = body mass index, CK = creatine kinase, CRP = C reactive protein, eGFR = estimated glomerular filtration rate

**Supplementary table S3.** Univariate correlation analysis of several clinical parameters to 6-FAM MFI after 160 min of PFOB-NE challenge.

| Parameter        | STEMI    |                |         | SCAD     |                |         |
|------------------|----------|----------------|---------|----------|----------------|---------|
|                  | r        | r <sup>2</sup> | p-value | r        | r <sup>2</sup> | p-value |
| CMR infarct size | -0,02860 | 0,0008182      | 0,9515  | n.a.     | n.a.           | n.a.    |
| CK max           | 0,07617  | 0,005801       | 0,7792  | n.a.     | n.a.           | n.a.    |
| CRP              | -0,2551  | 0,06505        | 0,3589  | -0,1569  | 0,02461        | 0,5213  |
| Age              | -0,2726  | 0,07431        | 0,3070  | 0,1042   | 0,01086        | 0,6619  |
| Hemoglobin       | 0,1615   | 0,02609        | 0,5501  | 0,1436   | 0,02062        | 0,5459  |
| eGFR             | -0,3639  | 0,1325         | 0,1658  | -0,1208  | 0,01458        | 0,6120  |
| Creatinin        | 0,4452   | 0,1982         | 0,0840  | -0,03001 | 0,0009006      | 0,9001  |
| Leukocyte count  | -0,2675  | 0,07154        | 0,3166  | 0,2778   | 0,07720        | 0,1993  |
| Monocyte count   | 0,1119   | 0,01251        | 0,6800  | 0,2969   | 0,08817        | 0,2036  |

CMR = cardiac magnetic resonance imaging, CK = creatine kinase, CRP = C reactive protein, eGFR = estimated glomerular filtration rate
